# Supplementary material for: Dating the Origin and Estimating the Transmission Rates of the Major HIV-1 Clusters in Greece: Evidence about the Earliest Subtype A1 Epidemic in Europe
Source: MDPI journal article supplement (doi:10.3390/v14010101), 2022-01-06
Supplement: s1 [file s1]

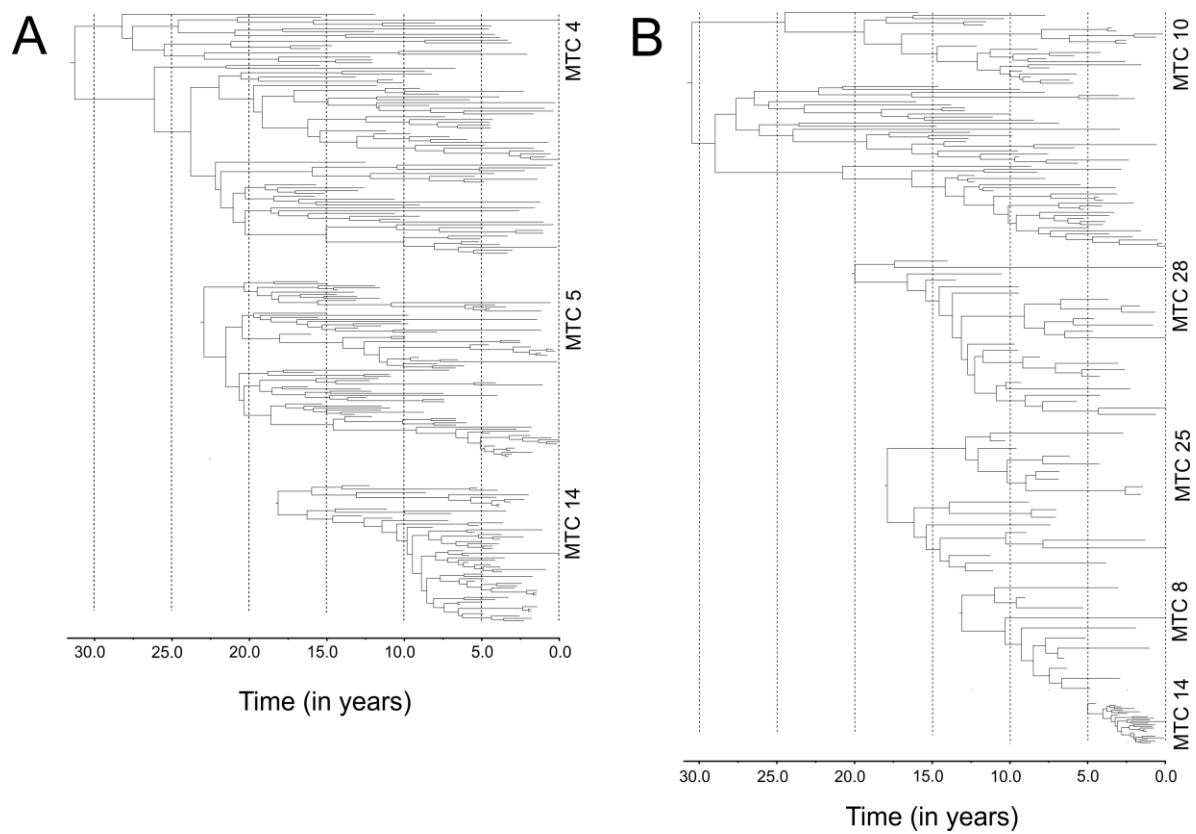

**Figure S1:** Dated phylogenetic trees of HIV-1 sequences found within A. Subtype A1 and B. Subtype B molecular transmission clusters (MTCs), estimated by molecular clock analysis implemented in BEAST program (version 1.8.0).
